# Supplementary material for: Understanding the different effects of 4d-transition metals on the performance of Li-rich cathode Li2MnO3 by first-principles
Source: Royal Society of Chemistry journal article supplement (doi:10.1039/d2cp04271a), 2022-12-14
Supplement: d2cp04271a1.pdf [file d2cp04271a1.pdf]

**Supporting Information for**  
**Understanding the different effects of 4*d*-transition metals on the**  
**performance of Li-rich cathode Li<sub>2</sub>MnO<sub>3</sub> by first-principles**

Shiwei Zhang<sup>a</sup>, Jianchuan Wang<sup>a,\*</sup>, Xiaoma Tao<sup>b</sup>, Xiangyu Yan<sup>a</sup>, Yong Du<sup>a</sup>, Hans J.  
Seifert<sup>c</sup>, Ting Lei<sup>a</sup>

<sup>a</sup> State Key Laboratory of Powder Metallurgy, Central South University, 410083,  
Changsha, China

<sup>b</sup> School of Physical Science and Technology, Guangxi University, 530004, Nanning,  
China

<sup>c</sup> Institute for Applied Materials, Karlsruhe Institute of Technology, Karlsruhe, 76131,  
Germany

Corresponding author: \* jcw728@126.com

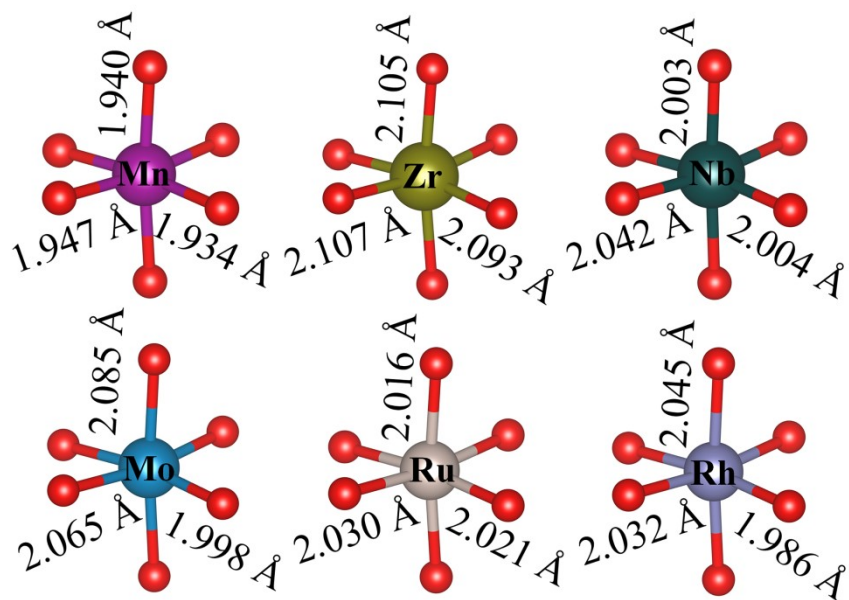

**Fig. S1.** The bond length of TM-O in  $\text{TMO}_6$  octahedron.

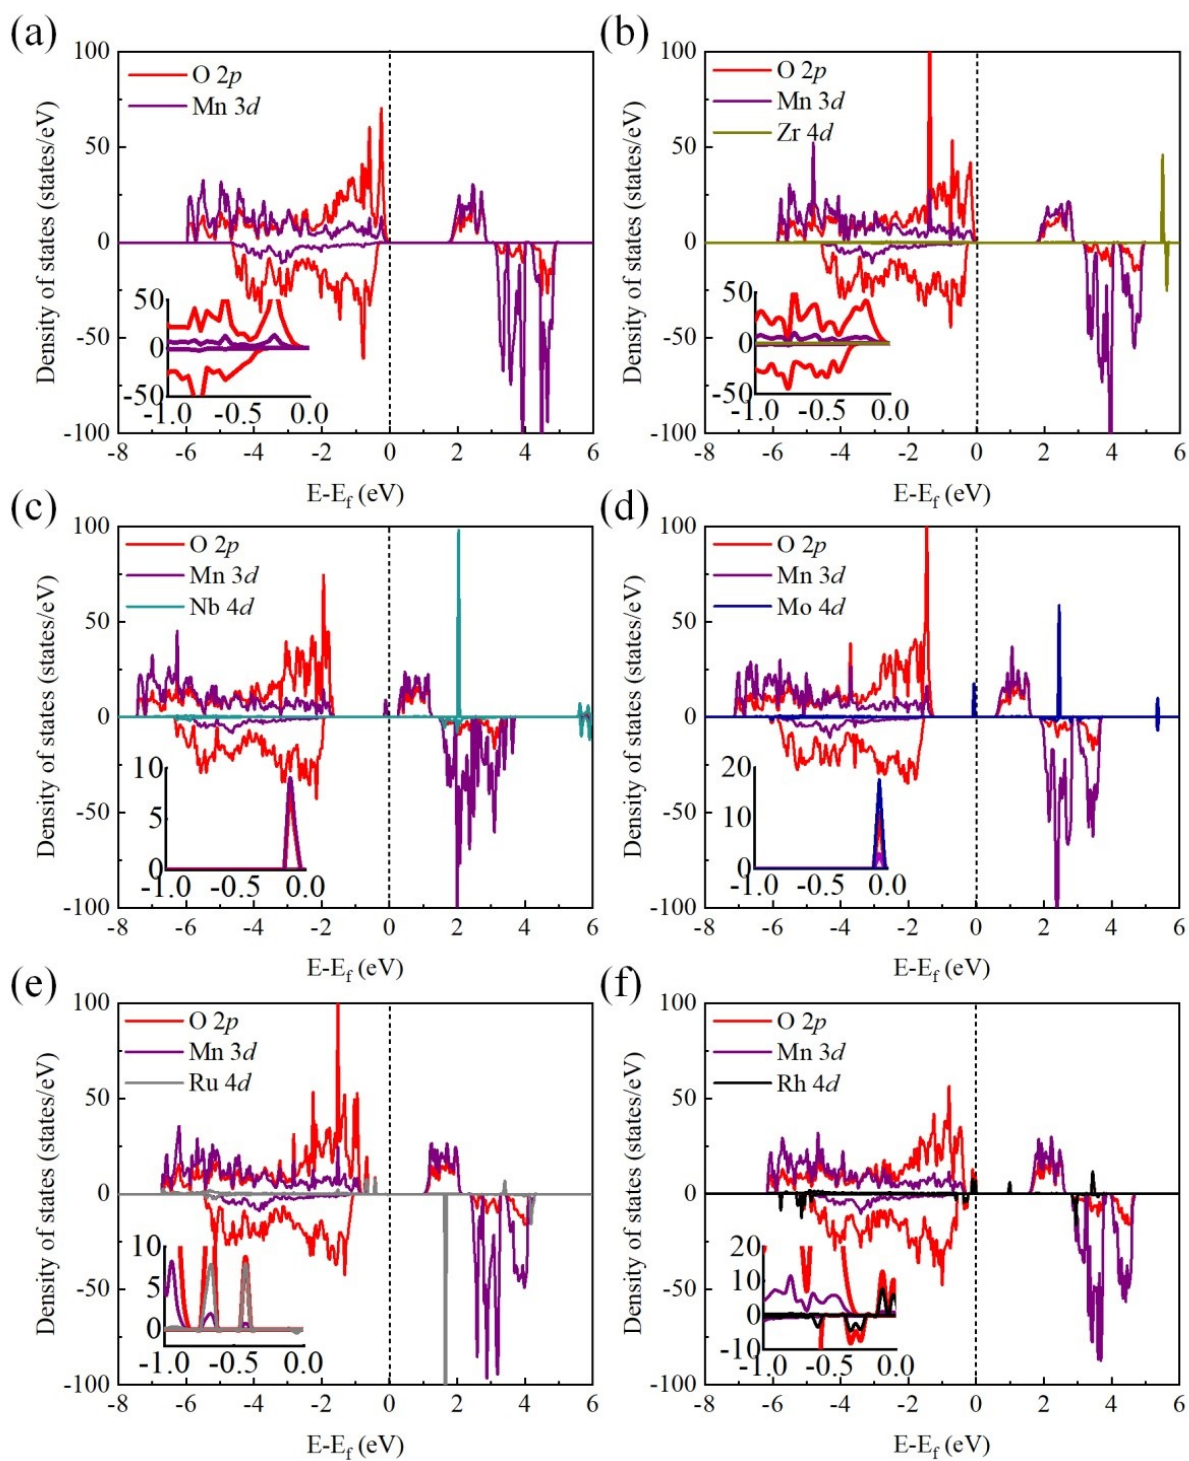

**Fig. S2.** Density of states of (a) pristine  $\text{Li}_2\text{MnO}_3$ , (b)  $\text{Zr-Li}_2\text{MnO}_3$ , (c)  $\text{Nb-Li}_2\text{MnO}_3$ , (d)  $\text{Mo-Li}_2\text{MnO}_3$ , (e)  $\text{Ru-Li}_2\text{MnO}_3$  and (f)  $\text{Rh-Li}_2\text{MnO}_3$ . The inset shows an enlarged view of the energy range of  $-0.1 - 0$  eV.  $E_f$  is the Fermi level, as indicated by the vertical dashed lines.

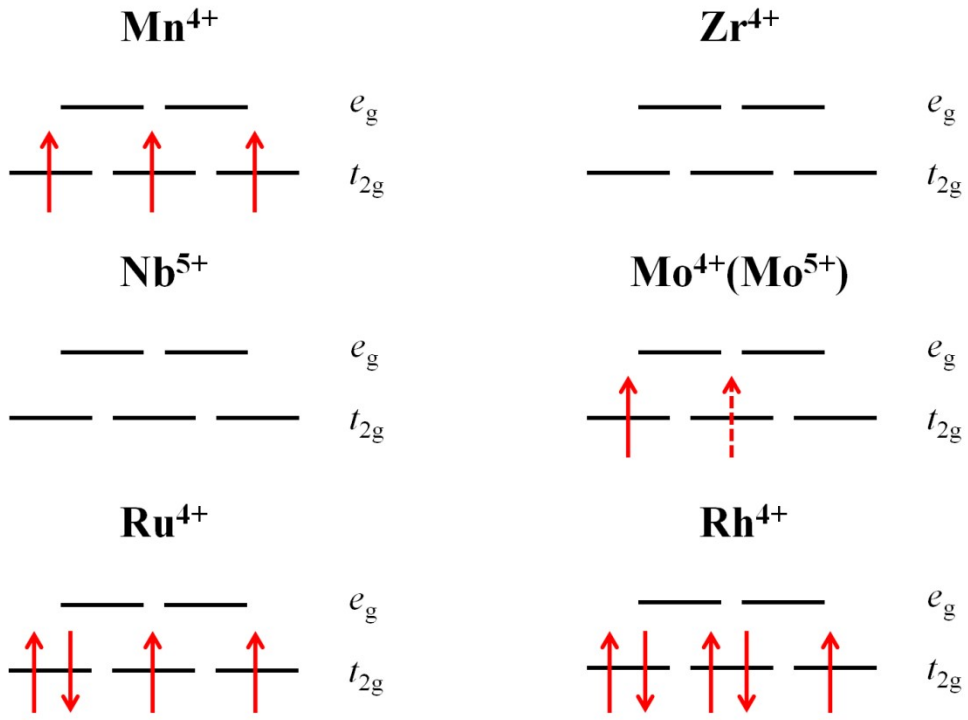

**Fig. S3.** The electron configuration of Mn in pristine  $\text{Li}_2\text{MnO}_3$  and the doped TM in TM- $\text{Li}_2\text{MnO}_3$ .

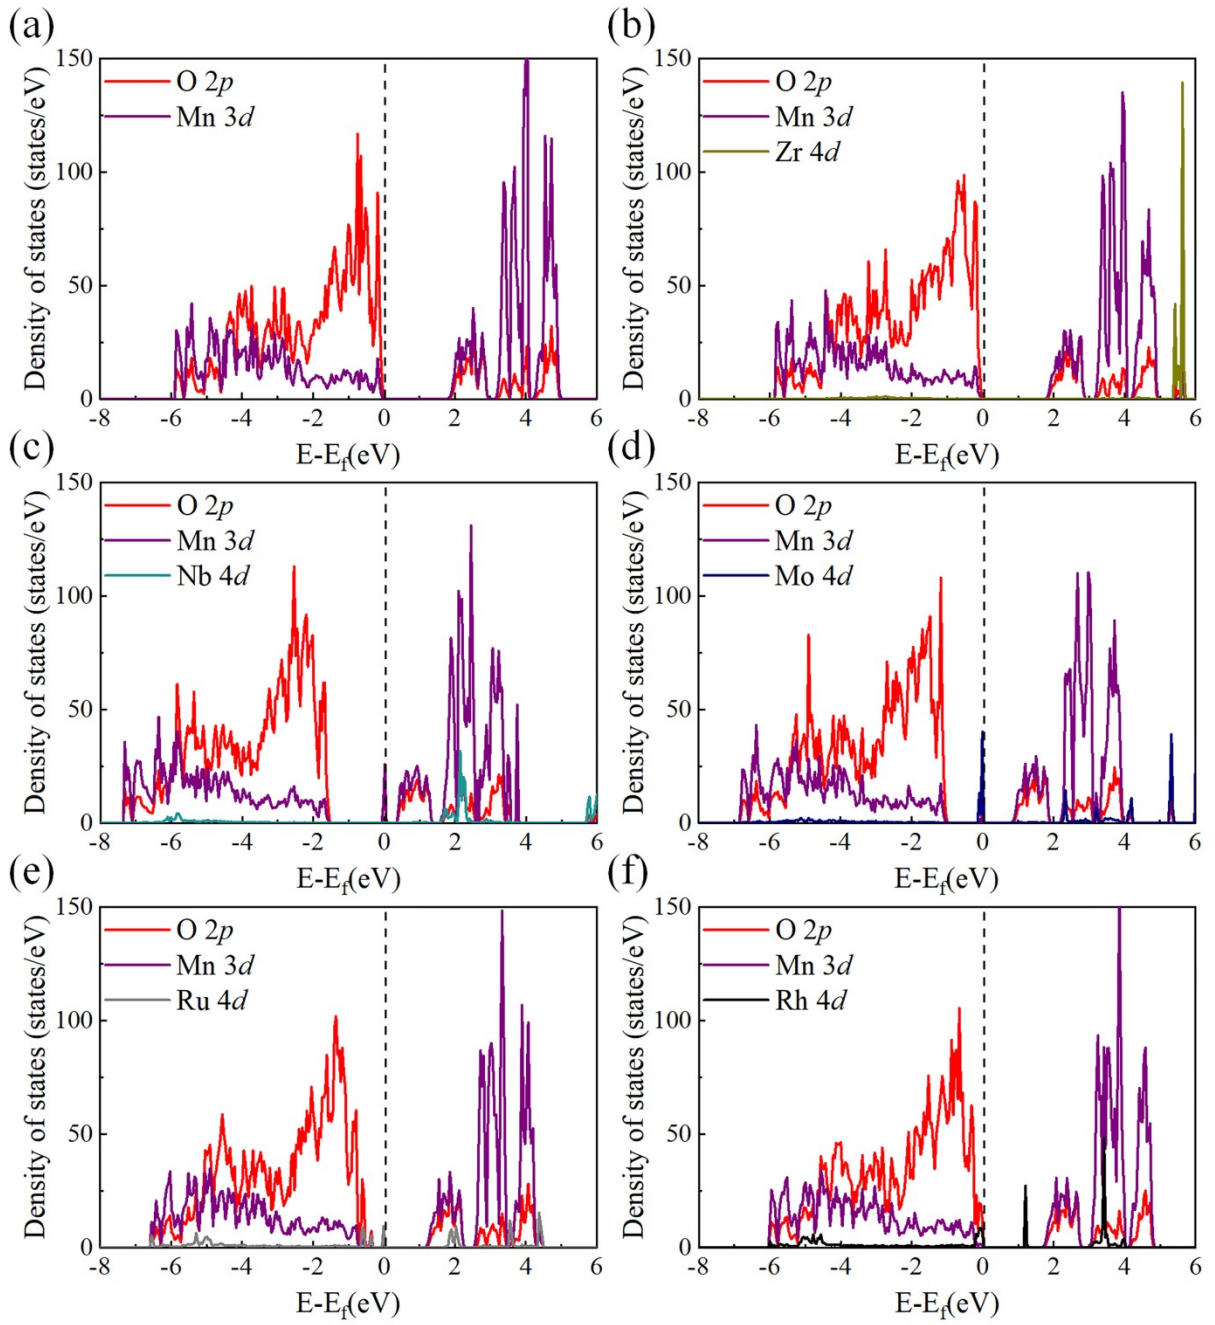

**Fig. S4.** Density of states with spin-orbital coupling. (a) pristine  $\text{Li}_2\text{MnO}_3$ , (b) Zr- $\text{Li}_2\text{MnO}_3$ , (c) Nb- $\text{Li}_2\text{MnO}_3$ , (d) Mo- $\text{Li}_2\text{MnO}_3$ , (e) Ru- $\text{Li}_2\text{MnO}_3$  and (f) Rh- $\text{Li}_2\text{MnO}_3$ . The vertical dashed lines denote the Fermi level.

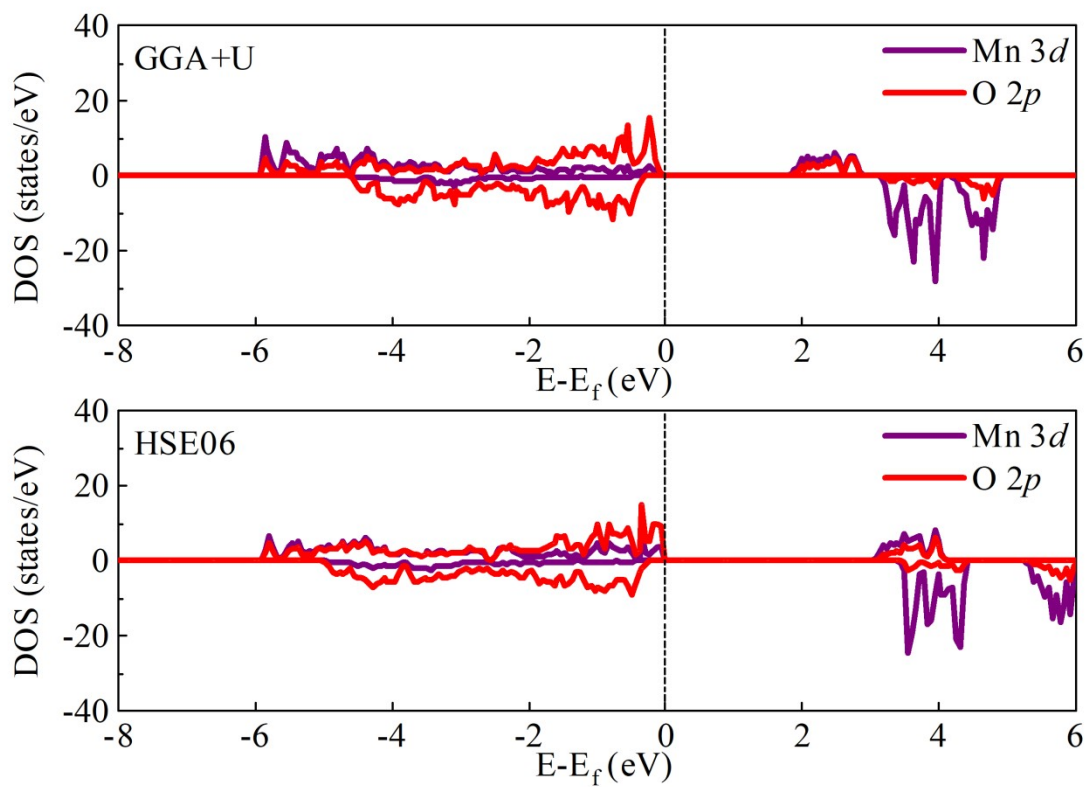

**Fig. S5.** Density of states of pristine  $\text{Li}_2\text{MnO}_3$  calculated by GGA+U method and HSE06 method. The vertical dashed lines denote the Fermi level.

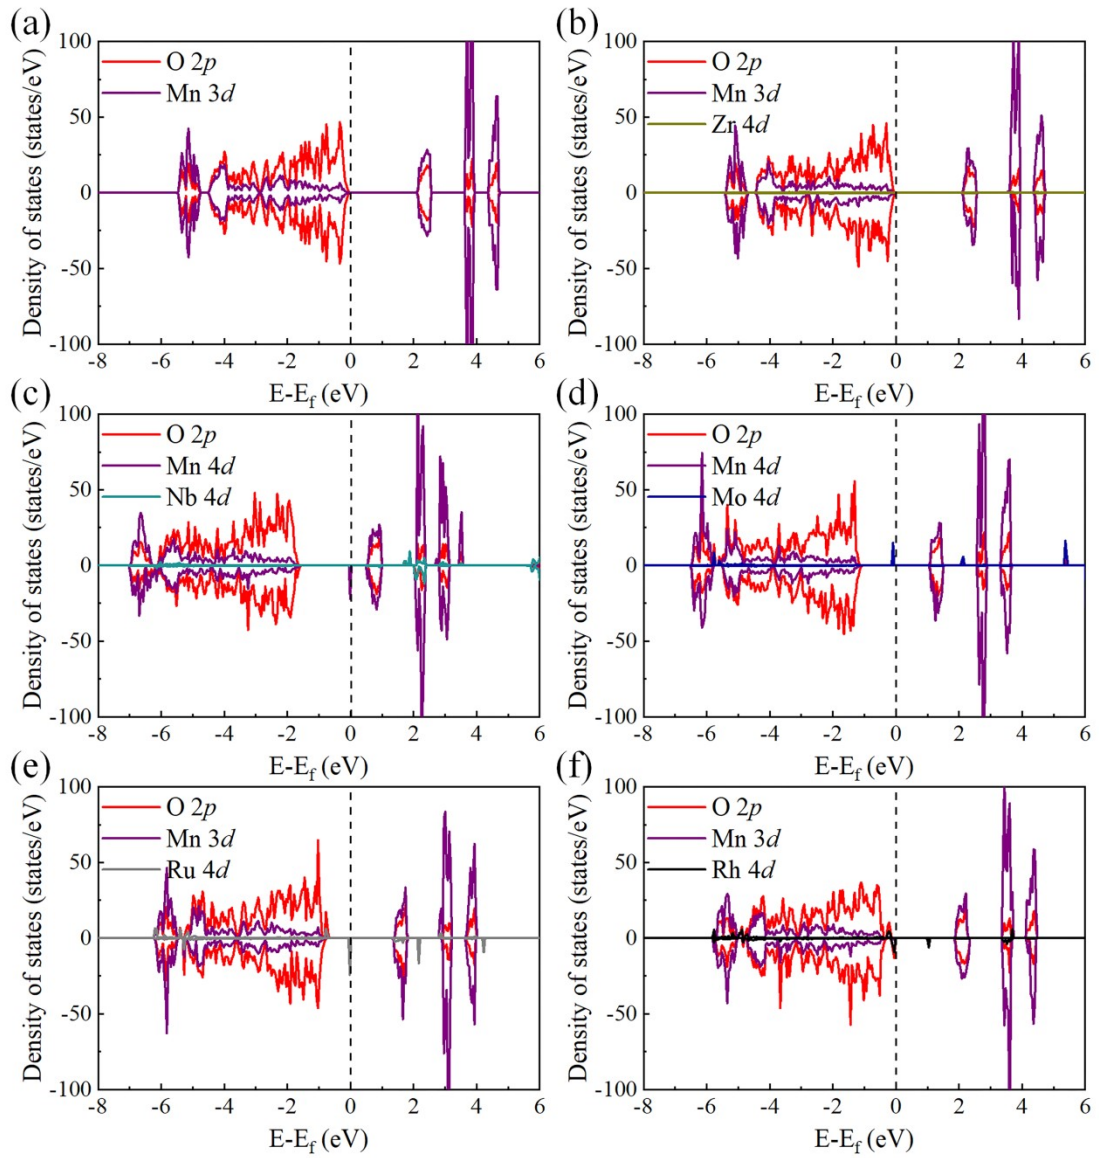

**Fig. S6.** Density of states of undoped and doped  $\text{Li}_2\text{MnO}_3$  with antiferromagnetic configuration. (a) pristine  $\text{Li}_2\text{MnO}_3$ , (b) Zr- $\text{Li}_2\text{MnO}_3$ , (c) Nb- $\text{Li}_2\text{MnO}_3$ , (d) Mo- $\text{Li}_2\text{MnO}_3$ , (e) Ru- $\text{Li}_2\text{MnO}_3$  and (f) Rh- $\text{Li}_2\text{MnO}_3$ . The vertical dashed lines denote the Fermi level.

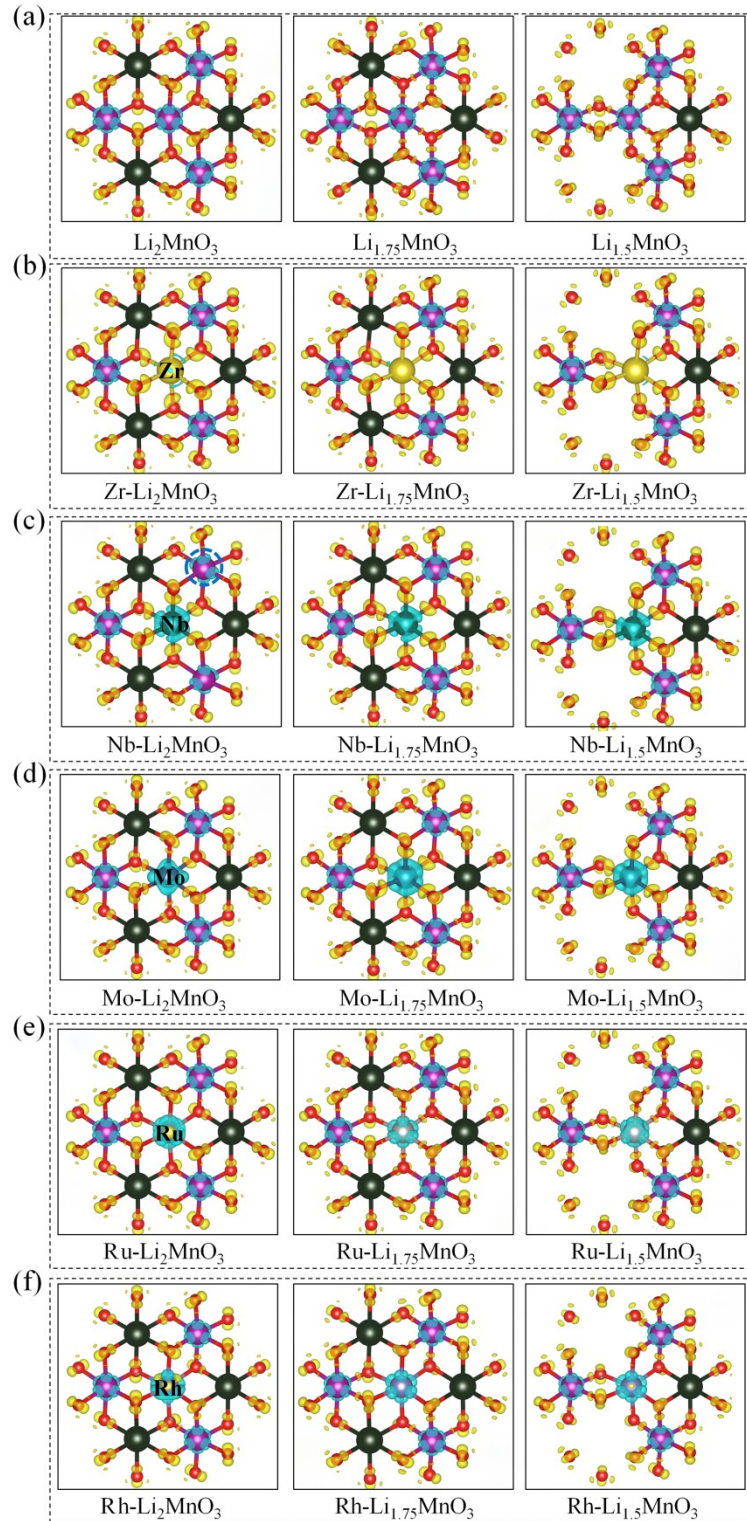

**Fig. S7.** Three-dimensional charge density differences of (a) pristine  $\text{Li}_2\text{MnO}_3$ , (b)  $\text{Zr-Li}_2\text{MnO}_3$ , (c)  $\text{Nb-Li}_2\text{MnO}_3$ , (d)  $\text{Mo-Li}_2\text{MnO}_3$ , (e)  $\text{Ru-Li}_2\text{MnO}_3$  and (f)  $\text{Rh-Li}_2\text{MnO}_3$  at different delithiation stages. Yellow zone indicates charge accumulation and blue zone implies charge depletion. The isosurface is  $0.03 \text{ e/Bohr}^3$ . The black circles indicate the sites where electron-holes are generated.



**Table S1.** The magnetic moments of Mn and doped TM.

| Element | Magnetic moment ( $\mu_B$ ) |
|---------|-----------------------------|
| Mn      | 3.145                       |
| Zr      | 0.008                       |
| Nb      | 0.016                       |
| Mo      | 1.770                       |
| Ru      | 1.646                       |
| Rh      | 0.718                       |

**Table S2.** The average Bader charges of Mn, doped TM, and O near the TM doping site in TM-Li<sub>2</sub>MnO<sub>3</sub> (TM: Zr, Nb, Mo, Ru and Rh).

| System                              | Average Bader charge (e) |        |                            |
|-------------------------------------|--------------------------|--------|----------------------------|
|                                     | Mn                       | O      | TM (Zr, Nb, Mo, Ru and Rh) |
| Li <sub>2</sub> MnO <sub>3</sub>    | +1.848                   | -1.208 | -                          |
| Zr-Li <sub>2</sub> MnO <sub>3</sub> | +1.834                   | -1.319 | +2.534                     |
| Nb-Li <sub>2</sub> MnO <sub>3</sub> | +1.794                   | -1.279 | +2.616                     |
| Mo-Li <sub>2</sub> MnO <sub>3</sub> | +1.838                   | -1.261 | +2.172                     |
| Ru-Li <sub>2</sub> MnO <sub>3</sub> | +1.844                   | -1.182 | +1.689                     |
| Rh-Li <sub>2</sub> MnO <sub>3</sub> | +1.848                   | -1.151 | +1.455                     |

**Table S3.** The intralayer diffusion barrier  $E_v$  of Li during initial delithiation.

| System                        | $E_v$ (eV)       |                  |
|-------------------------------|------------------|------------------|
|                               | Path $2c1 - 4h1$ | Path $2c1 - 4h2$ |
| $\text{Li}_2\text{MnO}_3$     | 0.58             | 0.83             |
| Zr- $\text{Li}_2\text{MnO}_3$ | 0.51             | 0.88             |
| Nb- $\text{Li}_2\text{MnO}_3$ | 0.53             | 0.85             |
| Mo- $\text{Li}_2\text{MnO}_3$ | 0.57             | 0.84             |
| Ru- $\text{Li}_2\text{MnO}_3$ | 0.56             | 0.82             |
| Rh- $\text{Li}_2\text{MnO}_3$ | 0.57             | 0.81             |

**Table S4.** The intralayer diffusion barrier  $E_v$  of Li during further delithiation.

| System                            | $E_v$ (eV)       |                  |
|-----------------------------------|------------------|------------------|
|                                   | Path $2c1 - 4h1$ | Path $2c2 - 4h2$ |
| $\text{Li}_{1.5}\text{MnO}_3$     | 0.27             | 0.48             |
| Zr- $\text{Li}_{1.5}\text{MnO}_3$ | 0.22             | 0.60             |
| Nb- $\text{Li}_{1.5}\text{MnO}_3$ | 0.22             | 0.54             |
| Mo- $\text{Li}_{1.5}\text{MnO}_3$ | 0.27             | 0.52             |
| Ru- $\text{Li}_{1.5}\text{MnO}_3$ | 0.24             | 0.50             |
| Rh- $\text{Li}_{1.5}\text{MnO}_3$ | 0.35             | 0.58             |

**Table S5.** The interlayer diffusion barrier  $E_v$  of Li on path  $2b - 4h2$  during initial and further delithiation.

| System                                | $E_v$ (eV)           |                      |
|---------------------------------------|----------------------|----------------------|
|                                       | Initial delithiation | Further delithiation |
| Li <sub>1.5</sub> MnO <sub>3</sub>    | 0.77                 | 0.21                 |
| Zr-Li <sub>1.5</sub> MnO <sub>3</sub> | 0.64                 | 0.17                 |
| Nb-Li <sub>1.5</sub> MnO <sub>3</sub> | 0.73                 | 0.16                 |
| Mo-Li <sub>1.5</sub> MnO <sub>3</sub> | 0.73                 | 0.17                 |
| Ru-Li <sub>1.5</sub> MnO <sub>3</sub> | 0.66                 | 0.22                 |
| Rh-Li <sub>1.5</sub> MnO <sub>3</sub> | 0.74                 | 0.27                 |
